# Supplementary material for: Seamless, rapid, and accurate analyses of outbreak genomic data using split k-mer analysis
Source: PubMed Central journal article supplement (PMC11529842; doi:10.1101/gr.279449.124), 2024-10
Supplement: Supplemental_material.pdf [file Supplemental_material.pdf]

# Supplemental Materials for

Seamless, rapid and accurate analyses of outbreak genomic data, using Split  
*K*-mer Analysis

Romain Derelle, Johanna von Wachsmann, Tommi Mäklin, Joel Hellewell, Timothy Russell, Ajit  
Lalvani, Leonid Chindelevitch, Nicholas J. Croucher, Simon R. Harris, John A. Lees

## Contents

|                                   |           |
|-----------------------------------|-----------|
| <b>Supplemental figures</b> ..... | <b>2</b>  |
| <b>Supplemental tables</b> .....  | <b>8</b>  |
| <b>Supplemental methods</b> ..... | <b>12</b> |

## Supplemental figures

Coverage histogram fit

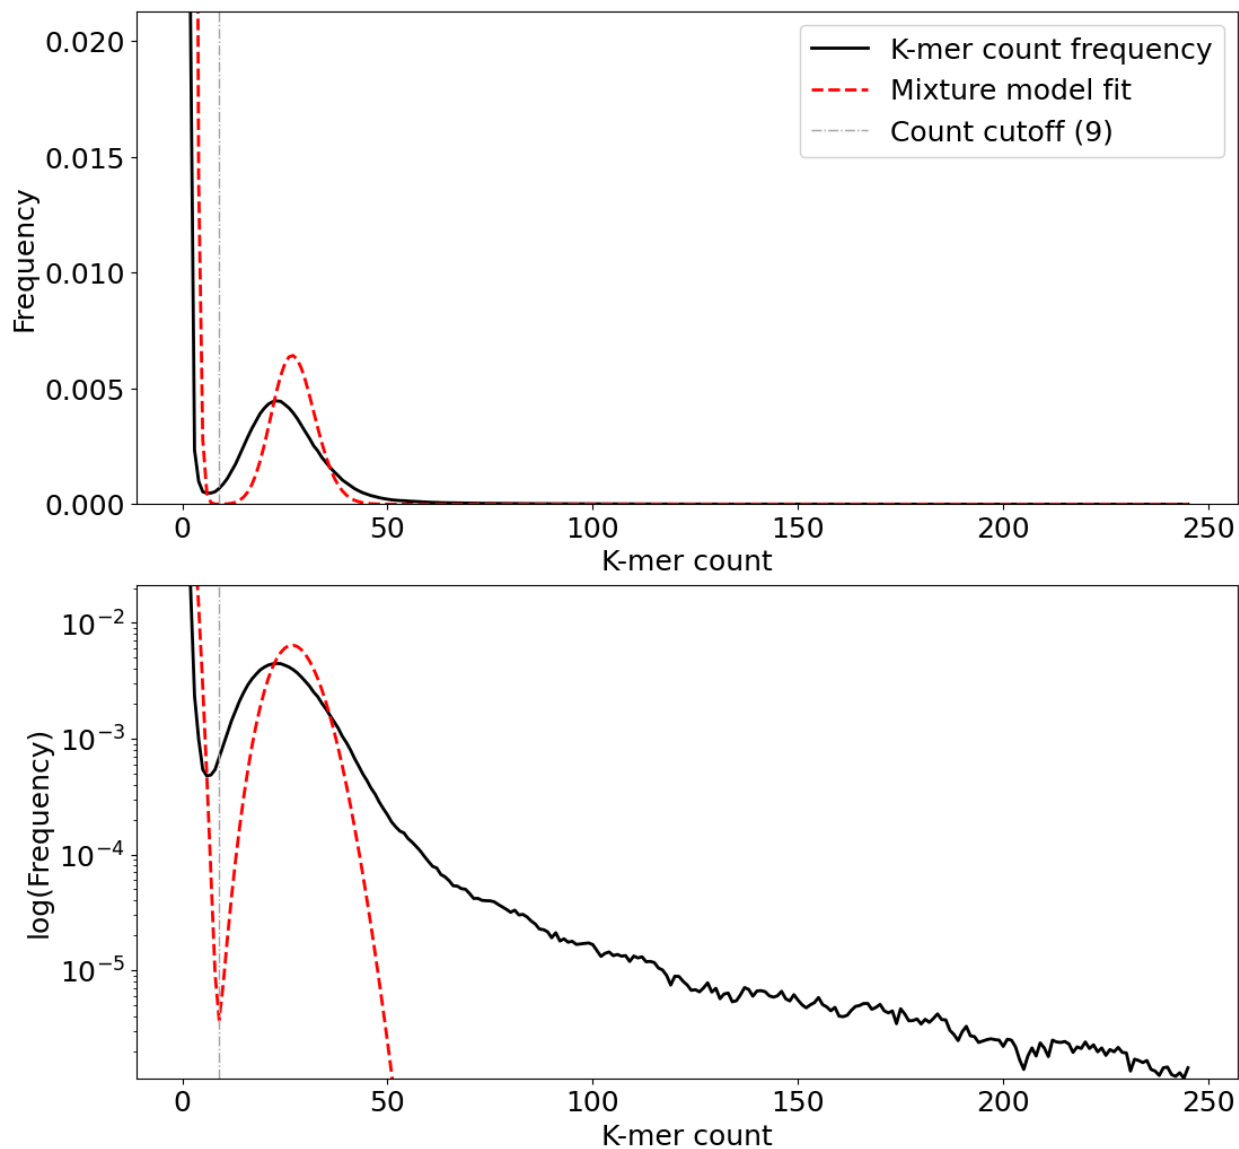

**Supplemental figure 1:** Example output of the coverage model *ska cov* fitted to k-mer count data from Illumina sequencing.

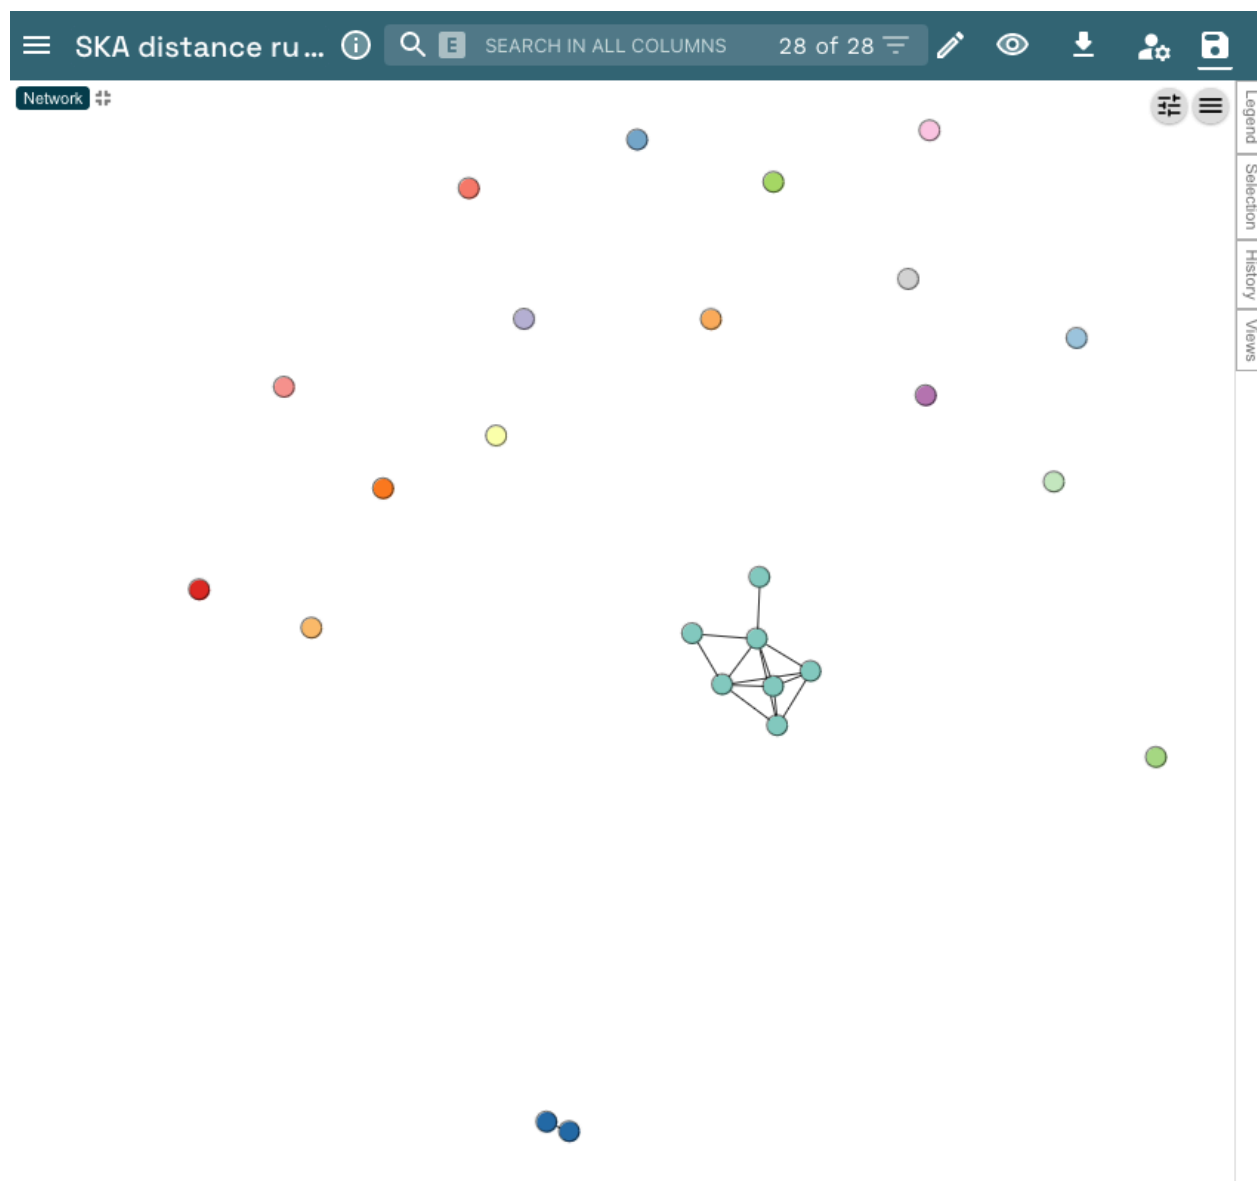

**Supplemental figure 2:** Example output of *ska distance*, connecting clusters below a given SNP threshold. Also available online

<https://microreact.org/project/icypNiESu31YhN1V8xzqX1-ska-distance-run-on-2023-jun-18-1730> and

<https://microreact.org/project/rNPR9KCnEWidVwvDmfbgQP-ska-distance-run-on-2023-jun-19-119>

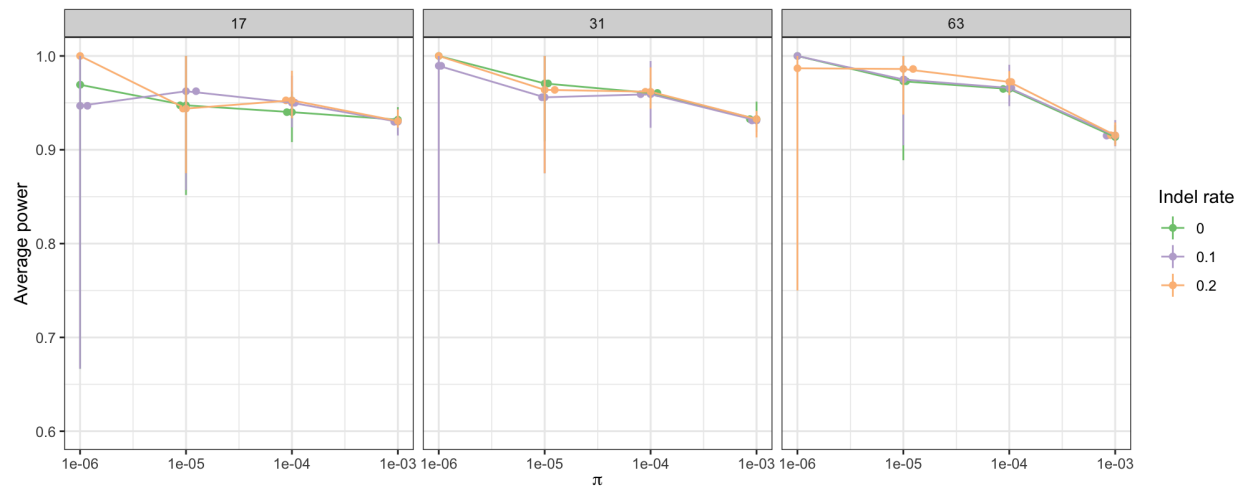

**Supplemental figure 3:** Effect of indels on SKA2's recall, same simulation setup as figure 2 but varying indel rate shown. Error bars are the 95% range from 20 repeats of the simulation.

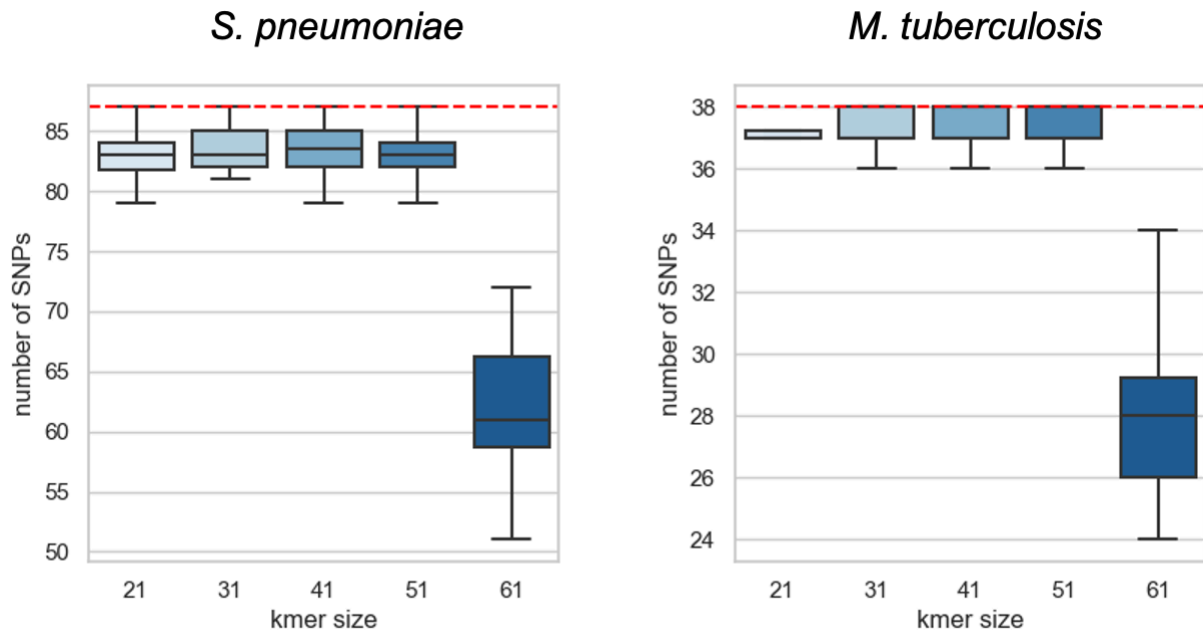

**Supplemental figure 4:** Number of SNP identified by SKA2 at different kmer sizes. The red dotted lines indicate the expected number of SNPs for each simulated outbreak.

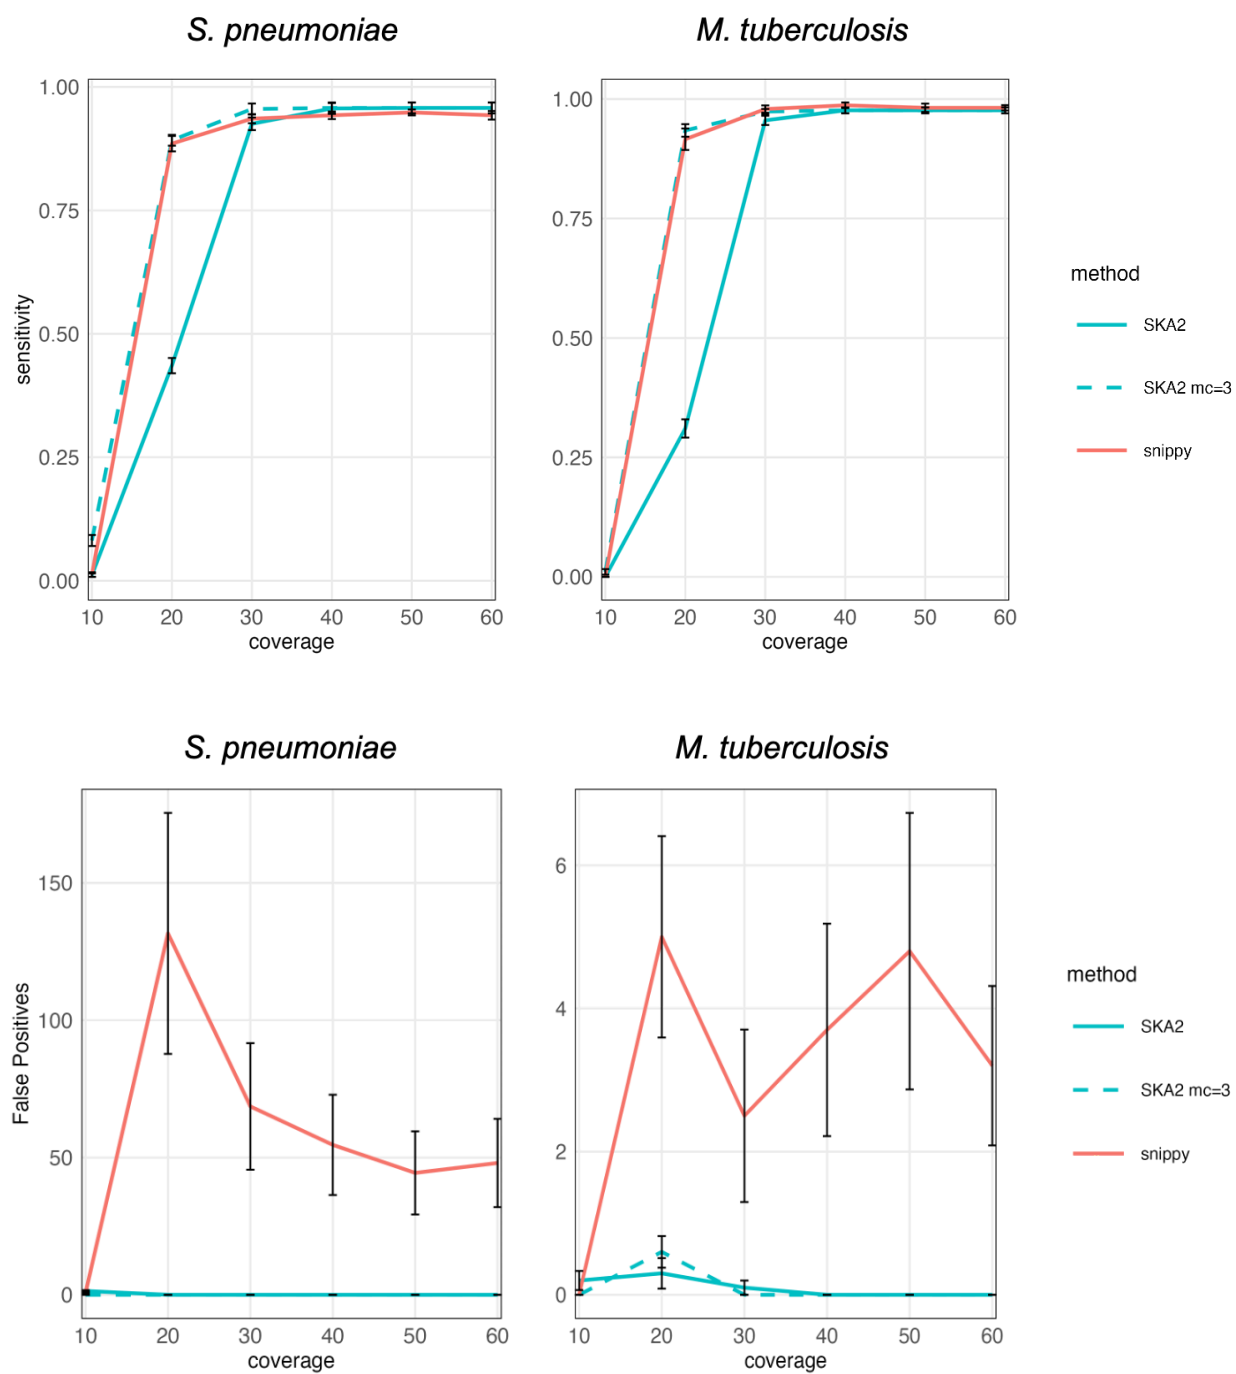

**Supplemental figure 5:** SNP detection at low coverages. The simulated outbreak analyses were repeated at low coverage settings for outbreaks generated from the strain genomes ATCC\_700669 and D39V, and H37Rv and lin\_4.8 for *S. pneumoniae* and *M. tuberculosis* respectively (i.e., a total of 10 simulated outbreaks at each coverage for each species). Error bars represent the 95% confidence interval.

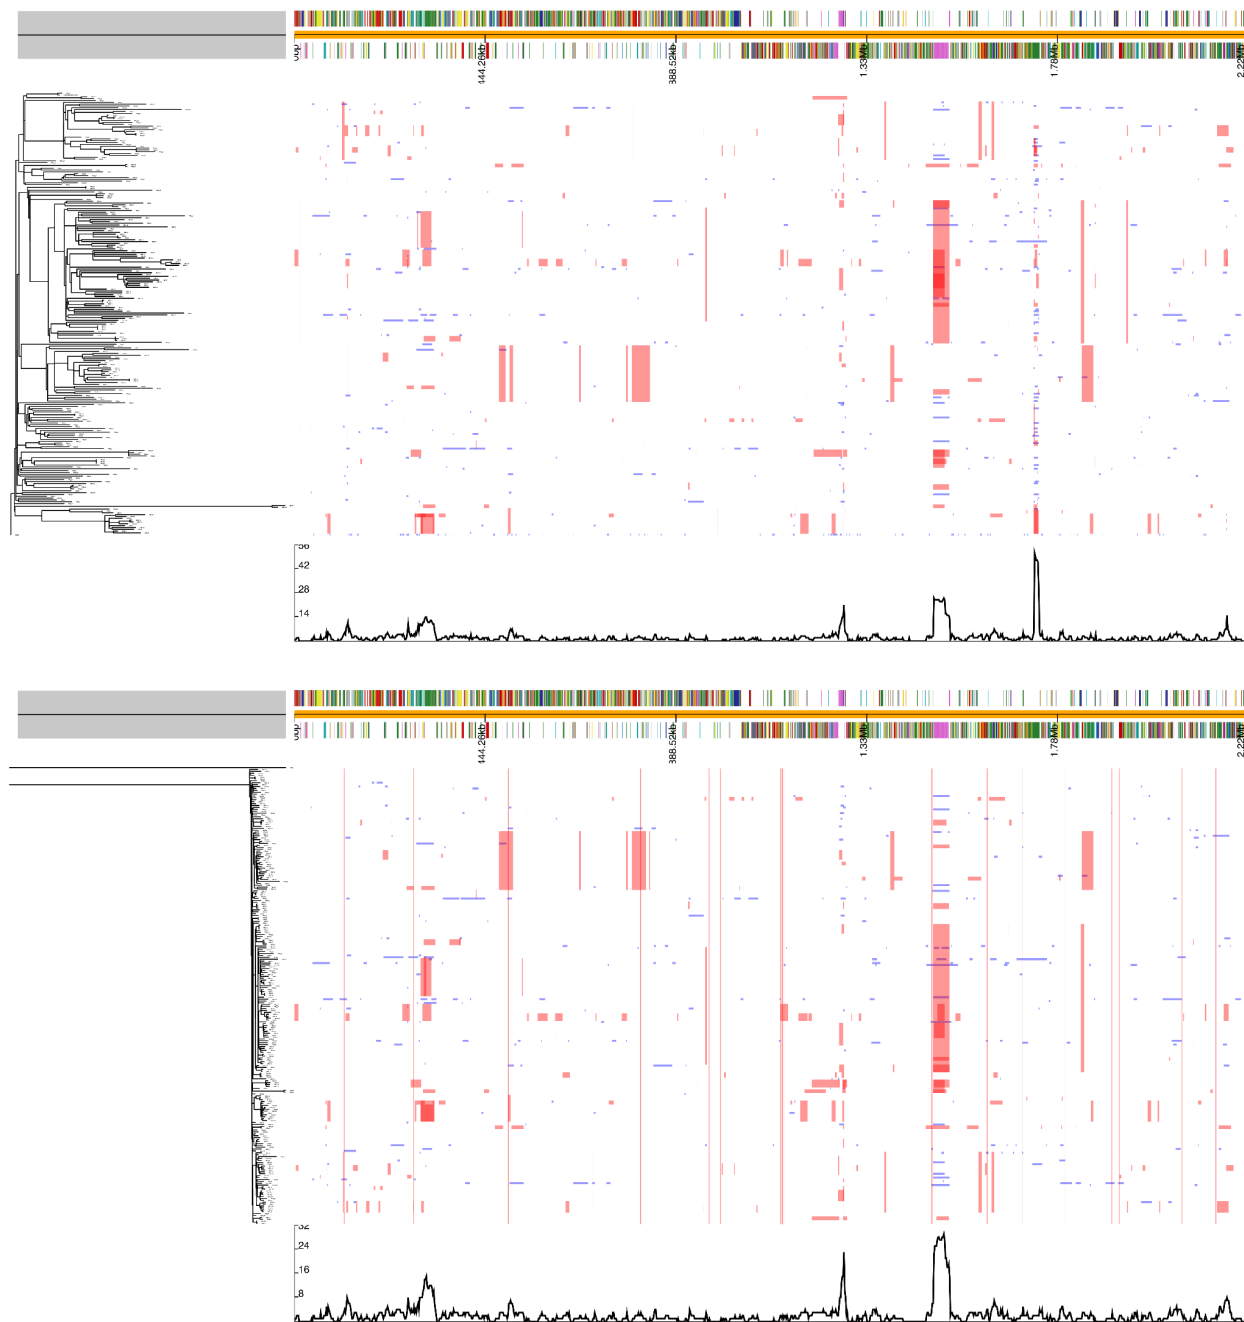

**Supplemental figure 6:** Gubbins analysis of PMEN1 samples. Top: original analysis using mapping and SNP calling from sequence reads against the Spn23F reference. Bottom: analysis using skat map. Visualised in phandango.

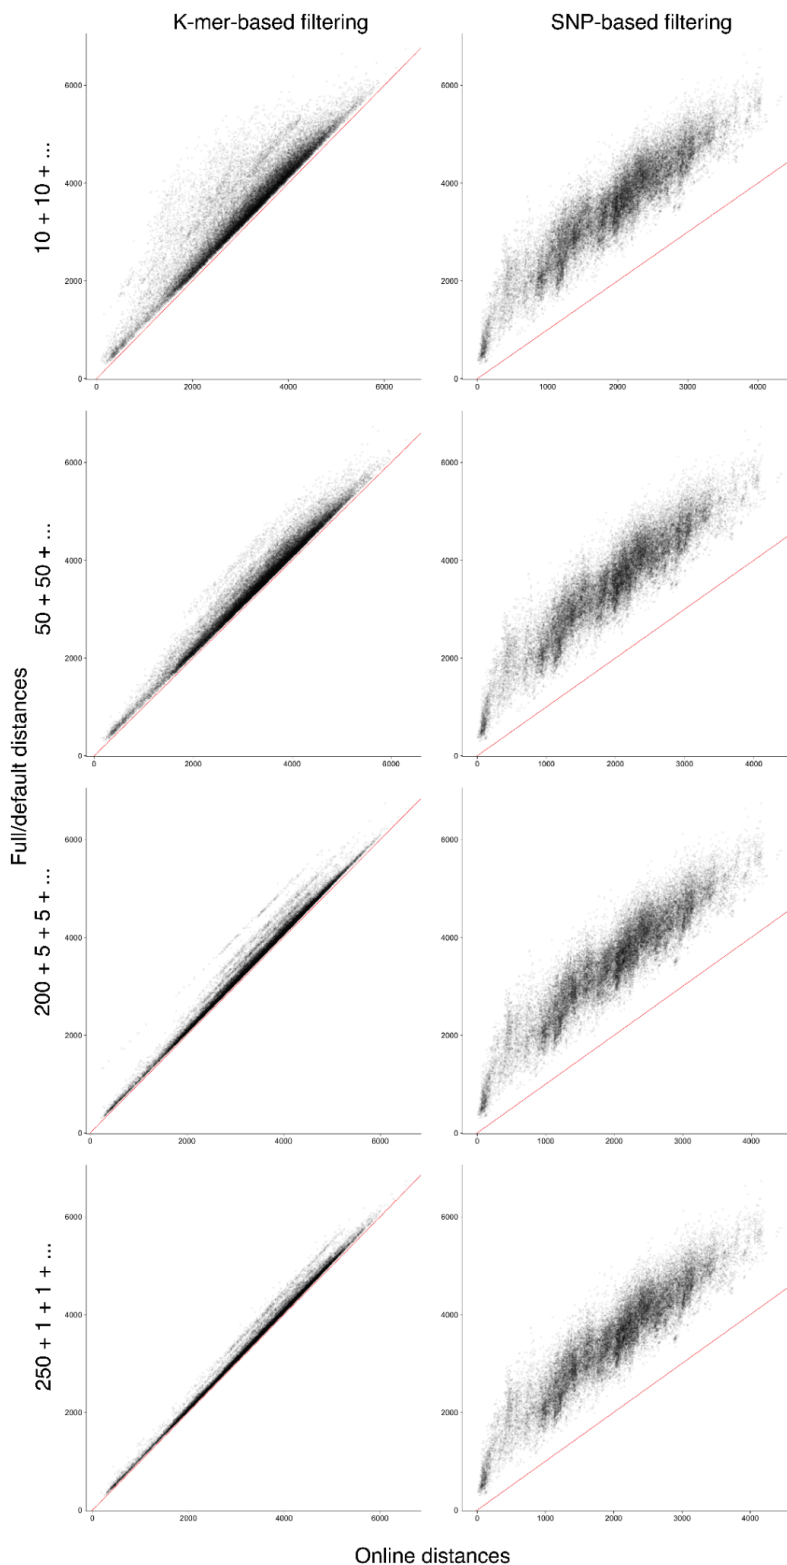

**Supplemental figure 7:** SNP distances between all pairs of samples in the online analysis versus the full analysis. Each row shows a different addition strategy. Each column shows a different filtering strategy.



## Supplemental tables

**Supplemental table 1:** Genome assembly accessions used as root and reference for the simulations of outbreaks

| <b>Species</b>                    | <b>Strain/lineage name</b> | <b>Assembly ID</b> |
|-----------------------------------|----------------------------|--------------------|
| <i>Streptococcus pneumoniae</i>   | ATCC_700669                | NC_011900.1        |
|                                   | D39V                       | NZ_CP027540.1      |
|                                   | GPSC47                     | NZ_LR216060.1      |
|                                   | Taiwan19F-14               | NC_012469.1        |
| <i>Mycobacterium tuberculosis</i> | H37Rv                      | NC_000962.3        |
|                                   | 4.8                        | NZ_CP041804.1      |
|                                   | 3                          | NZ_CP041871.1      |
|                                   | 1                          | NZ_AP018033.1      |

**Supplemental table 2:** List of the 288 *E. coli* genome GenBank accession numbers used in the online analysis.

GCA\_010806885.1 GCA\_902710505.2 GCA\_014482275.1 GCA\_018156485.1 GCA\_009684105.1  
GCA\_014510545.1 GCA\_012714485.1 GCA\_014094315.1 GCA\_013026005.1 GCA\_000459175.1  
GCA\_012351795.1 GCA\_002886425.1 GCA\_016655085.1 GCA\_000352825.1 GCA\_003308975.1  
GCA\_017716315.1 GCA\_012856475.1 GCA\_013392695.1 GCA\_002466895.1 GCA\_018185135.1  
GCA\_014137255.1 GCA\_003591475.1 GCA\_014643235.1 GCA\_014487175.1 GCA\_000459795.1  
GCA\_000777995.1 GCA\_012376145.2 GCA\_012992085.1 GCA\_902668645.1 GCA\_012903805.1  
GCA\_017004115.1 GCA\_013969625.1 GCA\_009683345.1 GCA\_014682415.1 GCA\_018194835.1  
GCA\_013352465.1 GCA\_012788855.1 GCA\_014748965.1 GCA\_017075295.1 GCA\_012983015.1  
GCA\_012297425.1 GCA\_012862355.1 GCA\_015208645.1 GCA\_000457935.1 GCA\_017066715.1  
GCA\_905133415.1 GCA\_000714995.1 GCA\_000408385.1 GCA\_014477995.1 GCA\_000350625.1  
GCA\_013181175.1 GCA\_017736995.1 GCA\_018173815.1 GCA\_014154705.1 GCA\_012952605.1  
GCA\_013176125.1 GCA\_015620605.1 GCA\_014327635.1 GCA\_017132035.1 GCA\_902161155.1  
GCA\_003145805.1 GCA\_011318155.1 GCA\_000503435.1 GCA\_017946865.1 GCA\_006230795.1  
GCA\_016389345.1 GCA\_017747605.1 GCA\_012859935.1 GCA\_012561205.1 GCA\_014080435.1  
GCA\_902859445.1 GCA\_000780295.1 GCA\_014477475.1 GCA\_016638765.1 GCA\_018170555.1  
GCA\_012617845.1 GCA\_903978025.1 GCA\_016113925.1 GCA\_013024015.1 GCA\_017673105.1  
GCA\_016786075.1 GCA\_902707515.2 GCA\_000776335.1 GCA\_012849635.1 GCA\_017722635.1  
GCA\_003338215.1 GCA\_015195705.1 GCA\_014747345.1 GCA\_012694085.1 GCA\_014083105.1  
GCA\_012766975.1 GCA\_013024525.1 GCA\_902841735.1 GCA\_005388865.1 GCA\_017841955.1  
GCA\_015283625.1 GCA\_013076465.1 GCA\_013022625.1 GCA\_013964425.1 GCA\_013016005.1  
GCA\_012875595.1 GCA\_017980015.1 GCA\_902827305.1 GCA\_013182875.1 GCA\_012366395.1  
GCA\_008041205.1 GCA\_013008035.1 GCA\_017171235.1 GCA\_014140465.1 GCA\_013964495.1  
GCA\_014143535.1 GCA\_012539615.1 GCA\_012171075.1 GCA\_014140875.1 GCA\_014140755.1  
GCA\_016092565.1 GCA\_003773645.1 GCA\_014080705.1 GCA\_006234075.1 GCA\_013182845.1  
GCA\_017065575.1 GCA\_014657315.1 GCA\_017066555.1 GCA\_013356645.1 GCA\_014081065.1  
GCA\_014761665.1 GCA\_013028765.1 GCA\_014159555.1 GCA\_017679305.1 GCA\_012856455.1  
GCA\_013022465.1 GCA\_013007695.1 GCA\_017737175.1 GCA\_011877805.1 GCA\_000776285.1  
GCA\_014144135.1 GCA\_014099175.1 GCA\_001621545.1 GCA\_018173595.1 GCA\_014642575.1  
GCA\_017064595.1 GCA\_011930115.1 GCA\_013964545.1 GCA\_013354395.1 GCA\_013041445.1  
GCA\_012300705.1 GCA\_012865435.1 GCA\_014098595.1 GCA\_017721395.1 GCA\_013351065.1  
GCA\_012162085.1 GCA\_012776075.1 GCA\_017747845.1 GCA\_017947205.1 GCA\_013017745.1  
GCA\_012681385.1 GCA\_900500145.1 GCA\_013172405.1 GCA\_012752215.1 GCA\_017736035.1  
GCA\_013129415.1 GCA\_017822795.1 GCA\_902708585.2 GCA\_017005835.1 GCA\_012864875.1  
GCA\_017747445.1 GCA\_013026915.1 GCA\_014749705.1 GCA\_012478295.1 GCA\_013072125.1  
GCA\_002002255.1 GCA\_009683215.1 GCA\_002109565.1 GCA\_017737035.1 GCA\_000459815.1  
GCA\_018167175.1 GCA\_013968525.1 GCA\_902710295.2 GCA\_009729815.1 GCA\_015042015.1  
GCA\_015163115.1 GCA\_017673085.1 GCA\_014772575.1 GCA\_014902335.1 GCA\_902707215.2  
GCA\_012876505.1 GCA\_013512695.1 GCA\_012384675.2 GCA\_016242675.1 GCA\_000458515.1  
GCA\_014429545.1 GCA\_014470215.1 GCA\_012972545.1 GCA\_012601635.1 GCA\_012453665.1  
GCA\_003795545.1 GCA\_902849475.1 GCA\_013083485.1 GCA\_014421945.1 GCA\_018167975.1  
GCA\_012169475.1 GCA\_003322335.1 GCA\_009790015.1 GCA\_012680905.1 GCA\_012603555.1  
GCA\_015644435.1 GCA\_017822615.1 GCA\_012260985.1 GCA\_016574135.1 GCA\_902709295.2  
GCA\_902840725.1 GCA\_017779405.1 GCA\_012599375.1 GCA\_014099615.1 GCA\_012672805.1  
GCA\_018164155.1 GCA\_015138385.1 GCA\_012296825.1 GCA\_013062025.1 GCA\_012008175.1  
GCA\_017001175.1 GCA\_012700325.1 GCA\_012117835.1 GCA\_013068565.1 GCA\_009790475.1

GCA\_902708505.2 GCA\_014463365.1 GCA\_905133355.1 GCA\_014082825.1 GCA\_014935385.1  
GCA\_014733035.1 GCA\_012871915.1 GCA\_001749565.1 GCA\_015208465.1 GCA\_000326945.1  
GCA\_012330165.1 GCA\_012870815.1 GCA\_014098395.1 GCA\_000026325.2 GCA\_902709885.2  
GCA\_000456925.1 GCA\_902708615.2 GCA\_017736055.1 GCA\_903977735.1 GCA\_014479615.1  
GCA\_012564745.1 GCA\_012756775.1 GCA\_017002755.1 GCA\_012774335.1 GCA\_012474695.1  
GCA\_012642785.1 GCA\_000418635.1 GCA\_013972545.1 GCA\_014775885.1 GCA\_012225765.1  
GCA\_013008135.1 GCA\_012434655.1 GCA\_014779295.1 GCA\_015288625.1 GCA\_017787665.1  
GCA\_003892475.1 GCA\_012873715.1 GCA\_902838585.1 GCA\_000711415.1 GCA\_902847965.1  
GCA\_012695305.1 GCA\_012862105.1 GCA\_902710035.2 GCA\_900480125.1 GCA\_012759815.1  
GCA\_013009735.1 GCA\_008041395.1 GCA\_000458725.1 GCA\_012910105.1 GCA\_012805155.1  
GCA\_009766465.1 GCA\_014082595.1 GCA\_017034675.1 GCA\_012356355.1 GCA\_000164195.1  
GCA\_009683405.1 GCA\_017052855.1 GCA\_012871755.1 GCA\_009680755.1 GCA\_017066615.1  
GCA\_003885225.1 GCA\_012670565.1 GCA\_904419595.1

**Supplemental table 3:** Fitted minimum count thresholds for simulated read data at lower coverages on *Mycobacterium tuberculosis*. The fitted threshold is the model value output by *ska cov*, the minimum threshold is the first minima in the table of counts output by *ska cov*.

| Coverage | Fitted threshold | Minimum threshold |
|----------|------------------|-------------------|
| 10x      | 4                | 2                 |
| 20x      | 6                | 3                 |
| 30x      | 8                | 4                 |
| 40x      | 9                | 6                 |

# Supplemental methods

## Transphylo parameters

|                   | <i>S. pneumoniae</i> | <i>M. tuberculosis</i> |
|-------------------|----------------------|------------------------|
| Neg               | 250/365              | 100/365                |
| w.scale           | 1.5625               | 0.1                    |
| w.shape           | 1                    | 10                     |
| pi                | 0.5                  | 0.25                   |
| off.r             | 1.5                  | 5                      |
| dateStartOutbreak | 2005                 | 2005                   |
| dateT             | 2007                 | 2009                   |
| nSampled          | 12                   | 30                     |

## phastSim commands

### *M. tuberculosis*:

```
phastSim --outpath test_sim --mutationRates HKY85 0.23 0.5 0.17 0.33 0.33 0.17
--reference H37Rv.fna --treeFile mod_TransPhylo.tre --seed 0
--rootGenomeFrequencies 0
```

### *S. pneumoniae*:

```
phastSim --outpath test_sim --mutationRates HKY85 0.23 0.5 0.17 0.33 0.33 0.17
--reference Spn_ATCC_700669.fna --treeFile mod_TransPhylo.tre --seed 0
--insertionRate CONSTANT 0.0876 --deletionRate CONSTANT 0.0876
--insertionLength DISCRETE 0 0 0 0 0 0 0 0 0 0 0 0 0 0 0 0 0 0 0 0 0 0 0 0
0 0 0 0 0 0 0 0 0 0 0 0 0 0 0 0 0 0 0 0 0 0 0 0 0 0 0 0 0 0 0 0 0 0 0 0 0 0
0 0 0 0 0 0 0 0 0 0 0 0 0 0 0 0 0 0 0 0 0 0 0 0 0 0 0 0 0 0 0 0 0 0 0 0 0 0
--deletionLength DISCRETE 0 0 0 0 0 0 0 0 0 0 0 0 0 0 0 0 0 0 0 0 0 0 0 0 0 0
0 0 0 0 0 0 0 0 0 0 0 0 0 0 0 0 0 0 0 0 0 0 0 0 0 0 0 0 0 0 0 0 0 0 0 0 0 0
0 0 0 0 0 0 0 0 0 0 0 0 0 0 0 0 0 0 0 0 0 0 0 0 0 0 0 0 0 0 0 0 0 0 0 0 0 0
--rootGenomeFrequencies 0
```

## Commands used to run the BWA+BCFtools pipeline

```
bwa mem -t 1 -o sample.sam reference_genome.fna sample_1.fq.gz
sample_2.fq.gz
samtools view -q 20 -bs sample.sam > sample.bam
samtools sort -m 8G -o sample.sorted.bam sample.bam
samtools depth -Q 20 -q 20 -a sample.sorted.bam > sample_cov.txt
bcftools mpileup -Q 20 -f Spn_ATCC_700669.fna sample.sorted.bam -o
sample.vcf1
bcftools call -f GQ -o sample_SNPs.vcf -V indels -cv sample.vcf1
```
